# Supplementary material for: RNA sequencing reveals lncRNAs that specifically regulate unsaturated fatty acid generation in buffaloes
Source: Copernicus journal article supplement (doi:10.5194/aab-69-309-2026), 2026-05-26
Supplement: Supplementary file [file aab-69-309-2026-supplement-title-page.pdf › aab-69-309-2026-supplement-title-page.pdf]

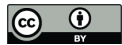

## *Supplement of*

# **RNA sequencing reveals lncRNAs that specifically regulate unsaturated fatty acid generation in buffaloes**

**Xinyu Zeng et al.**

*Correspondence to:* Jieping Huang ([huangjieping@gxu.edu.cn](mailto:huangjieping@gxu.edu.cn))

- [aab-69-309-2026-supplement-title-page.pdf](#)
- [Table S1.xlsx](#)
- [Table S10.xlsx](#)
- [Table S11.xlsx](#)
- [Table S12.xlsx](#)
- [Table S2.xlsx](#)
- [Table S3.xlsx](#)
- [Table S4.xlsx](#)
- [Table S5.xlsx](#)
- [Table S6.xlsx](#)
- [Table S7.xlsx](#)
- [Table S8.xlsx](#)
- [Table S9.xlsx](#)

The copyright of individual parts of the supplement might differ from the article licence.
